# Supplementary material
Source: MDPI journal article supplement (https://www.mdpi.com/2313-576X/9/2/31)
Supplement: s1 [file s1]

## SUPPLEMENTARY DATA

### 1. Measurement Model

#### 1.1. Regression Weights: (Measurement Model)

|      |      |    | Estimate | S.E. | C.R.   | P   |
|------|------|----|----------|------|--------|-----|
| MC_1 | <--- | MC | 1.000    |      |        |     |
| MC_2 | <--- | MC | 1.003    | .023 | 44.100 | *** |
| MC_3 | <--- | MC | .971     | .021 | 45.261 | *** |
| MC_4 | <--- | MC | .917     | .024 | 38.225 | *** |
| MC_5 | <--- | MC | .952     | .022 | 42.980 | *** |
| MC_6 | <--- | MC | .932     | .022 | 42.530 | *** |
| MC_7 | <--- | MC | .998     | .022 | 44.563 | *** |
| WP_1 | <--- | WP | 1.000    |      |        |     |
| WP_2 | <--- | WP | 1.012    | .031 | 32.964 | *** |
| WP_3 | <--- | WP | 1.146    | .033 | 34.938 | *** |
| WP_4 | <--- | WP | 1.075    | .031 | 34.686 | *** |
| WP_5 | <--- | WP | 1.146    | .032 | 35.640 | *** |
| WP_6 | <--- | WP | 1.157    | .032 | 36.252 | *** |
| Lw_1 | <--- | Lw | 1.000    |      |        |     |
| Lw_2 | <--- | Lw | 1.126    | .031 | 36.362 | *** |
| Lw_3 | <--- | Lw | 1.114    | .031 | 35.931 | *** |
| Lw_4 | <--- | Lw | 1.089    | .030 | 36.684 | *** |
| Lw_5 | <--- | Lw | 1.020    | .034 | 29.864 | *** |
| Lw_6 | <--- | Lw | .815     | .029 | 28.187 | *** |
| JS_1 | <--- | JS | 1.000    |      |        |     |
| JS_2 | <--- | JS | .974     | .017 | 58.109 | *** |
| JS_3 | <--- | JS | .912     | .024 | 38.628 | *** |
| JS_4 | <--- | JS | .953     | .024 | 40.450 | *** |
| JS_5 | <--- | JS | 1.057    | .021 | 51.239 | *** |
| Tr_1 | <--- | Tr | 1.000    |      |        |     |
| Tr_2 | <--- | Tr | 1.119    | .044 | 25.478 | *** |
| Tr_3 | <--- | Tr | 1.176    | .043 | 27.662 | *** |
| Tr_4 | <--- | Tr | 1.022    | .042 | 24.574 | *** |
| Tr_5 | <--- | Tr | 1.270    | .044 | 28.801 | *** |
| PE_1 | <--- | PE | 1.000    |      |        |     |
| PE_2 | <--- | PE | .925     | .033 | 28.252 | *** |
| PE_3 | <--- | PE | .972     | .033 | 29.837 | *** |
| PE_4 | <--- | PE | .921     | .035 | 26.454 | *** |
| PE_5 | <--- | PE | 1.012    | .033 | 30.470 | *** |
| WC_1 | <--- | WC | 1.000    |      |        |     |
| WC_2 | <--- | WC | 1.293    | .038 | 34.052 | *** |
| WC_3 | <--- | WC | 1.352    | .038 | 35.328 | *** |
| WC_4 | <--- | WC | 1.314    | .039 | 33.603 | *** |
| Me_1 | <--- | Me | 1.000    |      |        |     |
| Me_2 | <--- | Me | 1.059    | .028 | 38.322 | *** |
| Me_3 | <--- | Me | 1.028    | .026 | 40.161 | *** |
| Me_4 | <--- | Me | .994     | .027 | 37.300 | *** |

|      |      |    | Estimate | S.E. | C.R.   | P   |
|------|------|----|----------|------|--------|-----|
| Ac_1 | <--- | Ac | 1.000    |      |        |     |
| Ac_2 | <--- | Ac | 1.276    | .043 | 29.572 | *** |
| Ac_3 | <--- | Ac | 1.014    | .047 | 21.738 | *** |
| Ac_4 | <--- | Ac | 1.292    | .044 | 29.463 | *** |

## 1.2. Standardized Regression Weights: (Group number 1 - Default model)

|      |      |    | Estimate |
|------|------|----|----------|
| MC_1 | <--- | MC | .861     |
| MC_2 | <--- | MC | .874     |
| MC_3 | <--- | MC | .886     |
| MC_4 | <--- | MC | .808     |
| MC_5 | <--- | MC | .862     |
| MC_6 | <--- | MC | .857     |
| MC_7 | <--- | MC | .879     |
| WP_1 | <--- | WP | .773     |
| WP_2 | <--- | WP | .818     |
| WP_3 | <--- | WP | .857     |
| WP_4 | <--- | WP | .852     |
| WP_5 | <--- | WP | .871     |
| WP_6 | <--- | WP | .882     |
| Lw_1 | <--- | Lw | .775     |
| Lw_2 | <--- | Lw | .884     |
| Lw_3 | <--- | Lw | .876     |
| Lw_4 | <--- | Lw | .890     |
| Lw_5 | <--- | Lw | .756     |
| Lw_6 | <--- | Lw | .720     |
| JS_1 | <--- | JS | .884     |
| JS_2 | <--- | JS | .860     |
| JS_3 | <--- | JS | .805     |
| JS_4 | <--- | JS | .825     |
| JS_5 | <--- | JS | .937     |
| Tr_1 | <--- | Tr | .680     |
| Tr_2 | <--- | Tr | .765     |
| Tr_3 | <--- | Tr | .842     |
| Tr_4 | <--- | Tr | .734     |
| Tr_5 | <--- | Tr | .888     |
| PE_1 | <--- | PE | .775     |
| PE_2 | <--- | PE | .754     |
| PE_3 | <--- | PE | .791     |
| PE_4 | <--- | PE | .711     |
| PE_5 | <--- | PE | .807     |
| WC_1 | <--- | WC | .725     |
| WC_2 | <--- | WC | .912     |
| WC_3 | <--- | WC | .948     |
| WC_4 | <--- | WC | .901     |
| Me_1 | <--- | Me | .840     |

|      |      |    | Estimate |
|------|------|----|----------|
| Me_2 | <--- | Me | .851     |
| Me_3 | <--- | Me | .878     |
| Me_4 | <--- | Me | .836     |
| Ac_1 | <--- | Ac | .685     |
| Ac_2 | <--- | Ac | .910     |
| Ac_3 | <--- | Ac | .635     |
| Ac_4 | <--- | Ac | .902     |

### 1.3. Covariances: (Group number 1 - Default model)

|    |      |    | Estimate | S.E. | C.R.   | P   | Label  |
|----|------|----|----------|------|--------|-----|--------|
| MC | <--> | WP | .330     | .027 | 12.427 | *** | par_38 |
| MC | <--> | Lw | .312     | .028 | 11.263 | *** | par_39 |
| MC | <--> | JS | .437     | .032 | 13.871 | *** | par_40 |
| MC | <--> | Tr | .330     | .027 | 12.397 | *** | par_41 |
| MC | <--> | PE | .314     | .026 | 11.877 | *** | par_42 |
| MC | <--> | WC | .223     | .022 | 10.190 | *** | par_43 |
| MC | <--> | Me | .382     | .031 | 12.452 | *** | par_44 |
| MC | <--> | Ac | -.083    | .018 | -4.657 | *** | par_45 |
| WP | <--> | Lw | .269     | .025 | 10.933 | *** | par_46 |
| WP | <--> | JS | .364     | .028 | 13.019 | *** | par_47 |
| WP | <--> | Tr | .255     | .023 | 11.115 | *** | par_48 |
| WP | <--> | PE | .273     | .024 | 11.575 | *** | par_49 |
| WP | <--> | WC | .201     | .020 | 10.277 | *** | par_50 |
| WP | <--> | Me | .295     | .027 | 11.015 | *** | par_51 |
| WP | <--> | Ac | -.112    | .016 | -6.947 | *** | par_52 |
| Lw | <--> | JS | .356     | .029 | 12.136 | *** | par_53 |
| Lw | <--> | Tr | .276     | .025 | 11.204 | *** | par_54 |
| Lw | <--> | PE | .233     | .024 | 9.646  | *** | par_55 |
| Lw | <--> | WC | .265     | .022 | 12.082 | *** | par_56 |
| Lw | <--> | Me | .263     | .028 | 9.470  | *** | par_57 |
| Lw | <--> | Ac | -.109    | .017 | -6.364 | *** | par_58 |
| JS | <--> | Tr | .361     | .028 | 12.881 | *** | par_59 |
| JS | <--> | PE | .343     | .028 | 12.339 | *** | par_60 |
| JS | <--> | WC | .245     | .023 | 10.660 | *** | par_61 |
| JS | <--> | Me | .374     | .032 | 11.856 | *** | par_62 |
| JS | <--> | Ac | -.115    | .019 | -6.119 | *** | par_63 |
| Tr | <--> | PE | .241     | .023 | 10.569 | *** | par_64 |
| Tr | <--> | WC | .188     | .019 | 9.881  | *** | par_65 |
| Tr | <--> | Me | .268     | .026 | 10.301 | *** | par_66 |
| Tr | <--> | Ac | -.068    | .015 | -4.504 | *** | par_67 |
| PE | <--> | WC | .181     | .019 | 9.391  | *** | par_68 |
| PE | <--> | Me | .244     | .026 | 9.329  | *** | par_69 |
| PE | <--> | Ac | -.080    | .016 | -5.059 | *** | par_70 |
| WC | <--> | Me | .149     | .021 | 6.934  | *** | par_71 |
| WC | <--> | Ac | -.066    | .013 | -4.932 | *** | par_72 |
| Me | <--> | Ac | -.080    | .018 | -4.357 | *** | par_73 |

|     |      |     | Estimate | S.E. | C.R.  | P   | Label  |
|-----|------|-----|----------|------|-------|-----|--------|
| e20 | <--> | e21 | .127     | .013 | 9.726 | *** | par_74 |
| e22 | <--> | e23 | .125     | .015 | 8.257 | *** | par_75 |

#### 1.4. Correlations: (Group number 1 - Default model)

|     |      |     | Estimate |
|-----|------|-----|----------|
| MC  | <--> | WP  | .403     |
| MC  | <--> | Lw  | .357     |
| MC  | <--> | JS  | .450     |
| MC  | <--> | Tr  | .426     |
| MC  | <--> | PE  | .392     |
| MC  | <--> | WC  | .318     |
| MC  | <--> | Me  | .401     |
| MC  | <--> | Ac  | -.138    |
| WP  | <--> | Lw  | .353     |
| WP  | <--> | JS  | .430     |
| WP  | <--> | Tr  | .378     |
| WP  | <--> | PE  | .391     |
| WP  | <--> | WC  | .328     |
| WP  | <--> | Me  | .355     |
| WP  | <--> | Ac  | -.214    |
| Lw  | <--> | JS  | .393     |
| Lw  | <--> | Tr  | .383     |
| Lw  | <--> | PE  | .313     |
| Lw  | <--> | WC  | .406     |
| Lw  | <--> | Me  | .297     |
| Lw  | <--> | Ac  | -.194    |
| JS  | <--> | Tr  | .451     |
| JS  | <--> | PE  | .414     |
| JS  | <--> | WC  | .337     |
| JS  | <--> | Me  | .380     |
| JS  | <--> | Ac  | -.185    |
| Tr  | <--> | PE  | .365     |
| Tr  | <--> | WC  | .326     |
| Tr  | <--> | Me  | .342     |
| Tr  | <--> | Ac  | -.137    |
| PE  | <--> | WC  | .304     |
| PE  | <--> | Me  | .301     |
| PE  | <--> | Ac  | -.157    |
| WC  | <--> | Me  | .210     |
| WC  | <--> | Ac  | -.147    |
| Me  | <--> | Ac  | -.131    |
| e20 | <--> | e21 | .414     |
| e22 | <--> | e23 | .283     |

#### 1.5. Variances: (Group number 1 - Default model)

|     | Estimate | S.E. | C.R.   | P   | Label   |
|-----|----------|------|--------|-----|---------|
| MC  | .940     | .047 | 19.809 | *** | par_76  |
| WP  | .714     | .043 | 16.724 | *** | par_77  |
| Lw  | .814     | .049 | 16.753 | *** | par_78  |
| JS  | 1.006    | .049 | 20.449 | *** | par_79  |
| Tr  | .638     | .046 | 13.798 | *** | par_80  |
| PE  | .683     | .042 | 16.296 | *** | par_81  |
| WC  | .523     | .034 | 15.317 | *** | par_82  |
| Me  | .964     | .051 | 18.731 | *** | par_83  |
| Ac  | .387     | .028 | 13.963 | *** | par_84  |
| e1  | .329     | .015 | 22.578 | *** | par_85  |
| e2  | .292     | .013 | 22.103 | *** | par_86  |
| e3  | .244     | .011 | 21.593 | *** | par_87  |
| e4  | .421     | .018 | 23.808 | *** | par_88  |
| e5  | .294     | .013 | 22.525 | *** | par_89  |
| e6  | .294     | .013 | 22.678 | *** | par_90  |
| e7  | .276     | .013 | 21.909 | *** | par_91  |
| e8  | .480     | .020 | 23.696 | *** | par_92  |
| e9  | .361     | .016 | 22.788 | *** | par_93  |
| e10 | .339     | .016 | 21.548 | *** | par_94  |
| e11 | .311     | .014 | 21.741 | *** | par_95  |
| e12 | .300     | .014 | 20.938 | *** | par_96  |
| e13 | .272     | .013 | 20.297 | *** | par_97  |
| e14 | .541     | .023 | 23.493 | *** | par_98  |
| e15 | .288     | .015 | 19.717 | *** | par_99  |
| e16 | .306     | .015 | 20.238 | *** | par_100 |
| e17 | .252     | .013 | 19.279 | *** | par_101 |
| e18 | .637     | .027 | 23.803 | *** | par_102 |
| e19 | .501     | .021 | 24.252 | *** | par_103 |
| e20 | .282     | .015 | 18.695 | *** | par_104 |
| e21 | .335     | .017 | 19.967 | *** | par_105 |
| e22 | .455     | .020 | 22.517 | *** | par_106 |
| e23 | .429     | .019 | 21.996 | *** | par_107 |
| e24 | .156     | .012 | 12.739 | *** | par_108 |
| e25 | .740     | .031 | 23.871 | *** | par_109 |
| e26 | .566     | .025 | 22.375 | *** | par_110 |
| e27 | .362     | .019 | 19.460 | *** | par_111 |
| e28 | .569     | .025 | 23.034 | *** | par_112 |
| e29 | .274     | .017 | 16.028 | *** | par_113 |
| e30 | .453     | .022 | 20.945 | *** | par_114 |
| e31 | .445     | .021 | 21.621 | *** | par_115 |
| e32 | .385     | .019 | 20.350 | *** | par_116 |
| e33 | .567     | .025 | 22.645 | *** | par_117 |
| e34 | .375     | .019 | 19.692 | *** | par_118 |
| e35 | .473     | .019 | 24.642 | *** | par_119 |
| e36 | .176     | .009 | 18.722 | *** | par_120 |
| e37 | .107     | .008 | 13.287 | *** | par_121 |

|     | Estimate | S.E. | C.R.   | P   | Label   |
|-----|----------|------|--------|-----|---------|
| e38 | .210     | .011 | 19.842 | *** | par_122 |
| e39 | .401     | .020 | 20.200 | *** | par_123 |
| e40 | .413     | .021 | 19.660 | *** | par_124 |
| e41 | .303     | .017 | 17.793 | *** | par_125 |
| e42 | .412     | .020 | 20.436 | *** | par_126 |
| e43 | .437     | .018 | 23.939 | *** | par_127 |
| e44 | .130     | .011 | 12.101 | *** | par_128 |
| e45 | .589     | .024 | 24.476 | *** | par_129 |
| e46 | .148     | .011 | 13.106 | *** | par_130 |

## 2. Initial Structure Model

### 2.1. Regression Weights: (Initial Structure Model)

|      |      |    | Estimate | S.E. | C.R.   | P    |
|------|------|----|----------|------|--------|------|
| Ac   | <--- | MC | -.002    | .018 | -.124  | .902 |
| JS   | <--- | MC | .186     | .025 | 7.529  | ***  |
| Ac   | <--- | WP | -.097    | .022 | -4.472 | ***  |
| Ac   | <--- | Lw | -.075    | .021 | -3.515 | ***  |
| Ac   | <--- | Tr | -.006    | .023 | -.262  | .793 |
| Ac   | <--- | PE | -.048    | .022 | -2.182 | .029 |
| Ac   | <--- | WC | -.042    | .025 | -1.662 | .096 |
| Ac   | <--- | Me | -.020    | .018 | -1.075 | .282 |
| JS   | <--- | WP | .178     | .029 | 6.166  | ***  |
| JS   | <--- | Me | .124     | .024 | 5.070  | ***  |
| JS   | <--- | WC | .119     | .033 | 3.544  | ***  |
| JS   | <--- | PE | .189     | .030 | 6.392  | ***  |
| JS   | <--- | Tr | .214     | .032 | 6.724  | ***  |
| JS   | <--- | Lw | .143     | .029 | 4.978  | ***  |
| MC_1 | <--- | MC | 1.000    |      |        |      |
| MC_2 | <--- | MC | 1.001    | .021 | 47.296 | ***  |
| MC_3 | <--- | MC | .971     | .023 | 43.074 | ***  |
| MC_4 | <--- | MC | .933     | .025 | 37.868 | ***  |
| MC_5 | <--- | MC | .956     | .023 | 41.350 | ***  |
| MC_6 | <--- | MC | .914     | .023 | 38.900 | ***  |
| MC_7 | <--- | MC | 1.017    | .023 | 44.084 | ***  |
| WP_1 | <--- | WP | 1.000    |      |        |      |
| WP_2 | <--- | WP | .999     | .030 | 33.700 | ***  |
| WP_3 | <--- | WP | 1.179    | .035 | 33.743 | ***  |
| WP_4 | <--- | WP | 1.083    | .033 | 32.664 | ***  |
| WP_5 | <--- | WP | 1.183    | .034 | 34.483 | ***  |
| WP_6 | <--- | WP | 1.199    | .034 | 35.191 | ***  |
| Lw_1 | <--- | Lw | 1.000    |      |        |      |
| Lw_2 | <--- | Lw | 1.196    | .032 | 37.130 | ***  |
| Lw_3 | <--- | Lw | 1.215    | .039 | 31.268 | ***  |
| Lw_4 | <--- | Lw | 1.214    | .038 | 32.302 | ***  |

|      |      |    | Estimate | S.E. | C.R.   | P   |
|------|------|----|----------|------|--------|-----|
| Lw_5 | <--- | Lw | 1.091    | .037 | 29.432 | *** |
| Lw_6 | <--- | Lw | .878     | .032 | 27.074 | *** |
| JS_1 | <--- | JS | 1.000    |      |        |     |
| JS_2 | <--- | JS | .923     | .022 | 41.884 | *** |
| JS_3 | <--- | JS | .915     | .027 | 33.883 | *** |
| JS_4 | <--- | JS | .980     | .028 | 35.556 | *** |
| JS_5 | <--- | JS | 1.048    | .026 | 40.210 | *** |
| Tr_1 | <--- | Tr | 1.000    |      |        |     |
| Tr_2 | <--- | Tr | 1.163    | .047 | 24.567 | *** |
| Tr_3 | <--- | Tr | 1.172    | .046 | 25.638 | *** |
| Tr_4 | <--- | Tr | .942     | .040 | 23.359 | *** |
| Tr_5 | <--- | Tr | 1.393    | .050 | 27.673 | *** |
| PE_1 | <--- | PE | 1.000    |      |        |     |
| PE_2 | <--- | PE | .917     | .033 | 27.990 | *** |
| PE_3 | <--- | PE | .929     | .033 | 28.196 | *** |
| PE_4 | <--- | PE | .865     | .036 | 24.350 | *** |
| PE_5 | <--- | PE | 1.013    | .033 | 30.341 | *** |
| WC_1 | <--- | WC | 1.000    |      |        |     |
| WC_2 | <--- | WC | 1.323    | .038 | 35.133 | *** |
| WC_3 | <--- | WC | 1.406    | .043 | 33.074 | *** |
| WC_4 | <--- | WC | 1.355    | .043 | 31.709 | *** |
| Me_1 | <--- | Me | 1.000    |      |        |     |
| Me_2 | <--- | Me | 1.063    | .028 | 38.194 | *** |
| Me_3 | <--- | Me | 1.029    | .026 | 39.813 | *** |
| Me_4 | <--- | Me | .997     | .027 | 37.145 | *** |
| Ac_1 | <--- | Ac | 1.000    |      |        |     |
| Ac_2 | <--- | Ac | 1.275    | .044 | 28.977 | *** |
| Ac_3 | <--- | Ac | 1.014    | .048 | 21.341 | *** |
| Ac_4 | <--- | Ac | 1.293    | .045 | 28.887 | *** |

## 2.2. Standardized Regression Weights: (Initial Structure Model)

|    |      |    | Estimate |
|----|------|----|----------|
| Ac | <--- | MC | -.004    |
| JS | <--- | MC | .205     |
| Ac | <--- | WP | -.131    |
| Ac | <--- | Lw | -.103    |
| Ac | <--- | Tr | -.008    |
| Ac | <--- | PE | -.065    |
| Ac | <--- | WC | -.048    |
| Ac | <--- | Me | -.031    |
| JS | <--- | WP | .169     |
| JS | <--- | Me | .139     |
| JS | <--- | WC | .095     |
| JS | <--- | PE | .182     |
| JS | <--- | Tr | .189     |
| JS | <--- | Lw | .136     |

|      |      |    | Estimate |
|------|------|----|----------|
| MC_1 | <--- | MC | .854     |
| MC_2 | <--- | MC | .866     |
| MC_3 | <--- | MC | .879     |
| MC_4 | <--- | MC | .815     |
| MC_5 | <--- | MC | .859     |
| MC_6 | <--- | MC | .833     |
| MC_7 | <--- | MC | .889     |
| WP_1 | <--- | WP | .756     |
| WP_2 | <--- | WP | .791     |
| WP_3 | <--- | WP | .862     |
| WP_4 | <--- | WP | .839     |
| WP_5 | <--- | WP | .878     |
| WP_6 | <--- | WP | .894     |
| Lw_1 | <--- | Lw | .716     |
| Lw_2 | <--- | Lw | .865     |
| Lw_3 | <--- | Lw | .880     |
| Lw_4 | <--- | Lw | .914     |
| Lw_5 | <--- | Lw | .744     |
| Lw_6 | <--- | Lw | .715     |
| JS_1 | <--- | JS | .853     |
| JS_2 | <--- | JS | .774     |
| JS_3 | <--- | JS | .763     |
| JS_4 | <--- | JS | .810     |
| JS_5 | <--- | JS | .906     |
| Tr_1 | <--- | Tr | .654     |
| Tr_2 | <--- | Tr | .765     |
| Tr_3 | <--- | Tr | .807     |
| Tr_4 | <--- | Tr | .650     |
| Tr_5 | <--- | Tr | .938     |
| PE_1 | <--- | PE | .784     |
| PE_2 | <--- | PE | .755     |
| PE_3 | <--- | PE | .765     |
| PE_4 | <--- | PE | .675     |
| PE_5 | <--- | PE | .817     |
| WC_1 | <--- | WC | .702     |
| WC_2 | <--- | WC | .904     |
| WC_3 | <--- | WC | .956     |
| WC_4 | <--- | WC | .900     |
| Me_1 | <--- | Me | .839     |
| Me_2 | <--- | Me | .852     |
| Me_3 | <--- | Me | .877     |
| Me_4 | <--- | Me | .836     |
| Ac_1 | <--- | Ac | .679     |
| Ac_2 | <--- | Ac | .907     |
| Ac_3 | <--- | Ac | .629     |
| Ac_4 | <--- | Ac | .899     |



### 2.3. Covariances: (Initial Structure Model)

|     |      |     | Estimate | S.E. | C.R.   | P    |
|-----|------|-----|----------|------|--------|------|
| e20 | <--> | e21 | .175     | .013 | 13.082 | ***  |
| e22 | <--> | e23 | .104     | .015 | 6.753  | ***  |
| e32 | <--> | e33 | .145     | .019 | 7.755  | ***  |
| e20 | <--> | e22 | .035     | .011 | 3.076  | .002 |
| e14 | <--> | e15 | .166     | .016 | 10.483 | ***  |
| e1  | <--> | e2  | .065     | .012 | 5.611  | ***  |
| e27 | <--> | e28 | .215     | .019 | 11.269 | ***  |
| e14 | <--> | e18 | .126     | .018 | 6.898  | ***  |
| e5  | <--> | e6  | .063     | .010 | 6.058  | ***  |
| e35 | <--> | e36 | .069     | .011 | 6.467  | ***  |
| e25 | <--> | e28 | .124     | .020 | 6.188  | ***  |
| e8  | <--> | e9  | .084     | .014 | 6.048  | ***  |
| e9  | <--> | e11 | .070     | .012 | 5.833  | ***  |
| e3  | <--> | e6  | .059     | .010 | 5.920  | ***  |
| e14 | <--> | e19 | .066     | .015 | 4.326  | ***  |
| e21 | <--> | e24 | .090     | .012 | 7.453  | ***  |

### 2.4. Correlations: (Initial Structure Model)

|     |      |     | Estimate |
|-----|------|-----|----------|
| e20 | <--> | e21 | .501     |
| e22 | <--> | e23 | .250     |
| e32 | <--> | e33 | .282     |
| e20 | <--> | e22 | .097     |
| e14 | <--> | e15 | .354     |
| e1  | <--> | e2  | .199     |
| e27 | <--> | e28 | .386     |
| e14 | <--> | e18 | .190     |
| e5  | <--> | e6  | .198     |
| e35 | <--> | e36 | .223     |
| e25 | <--> | e28 | .166     |
| e8  | <--> | e9  | .184     |
| e9  | <--> | e11 | .189     |
| e3  | <--> | e6  | .200     |
| e14 | <--> | e19 | .115     |
| e21 | <--> | e24 | .321     |

### 2.5. Variances: (Initial Structure Model)

|     | Estimate | S.E. | C.R.   | P   |
|-----|----------|------|--------|-----|
| MC  | .925     | .048 | 19.421 | *** |
| WP  | .683     | .042 | 16.135 | *** |
| Lw  | .690     | .047 | 14.789 | *** |
| Tr  | .590     | .045 | 13.121 | *** |
| PE  | .697     | .043 | 16.344 | *** |
| WC  | .491     | .034 | 14.585 | *** |
| Me  | .961     | .051 | 18.666 | *** |
| e48 | .618     | .033 | 18.439 | *** |
| e47 | .361     | .026 | 13.750 | *** |

|     | Estimate | S.E. | C.R.   | P   |
|-----|----------|------|--------|-----|
| e1  | .344     | .016 | 21.436 | *** |
| e2  | .310     | .015 | 20.998 | *** |
| e3  | .257     | .012 | 20.676 | *** |
| e4  | .407     | .018 | 23.118 | *** |
| e5  | .301     | .014 | 21.631 | *** |
| e6  | .340     | .016 | 21.755 | *** |
| e7  | .254     | .013 | 20.281 | *** |
| e8  | .512     | .022 | 23.614 | *** |
| e9  | .408     | .018 | 22.608 | *** |
| e10 | .328     | .016 | 20.820 | *** |
| e11 | .336     | .016 | 21.577 | *** |
| e12 | .283     | .014 | 19.909 | *** |
| e13 | .247     | .013 | 18.773 | *** |
| e14 | .658     | .028 | 23.825 | *** |
| e15 | .333     | .016 | 20.226 | *** |
| e16 | .296     | .015 | 19.208 | *** |
| e17 | .200     | .012 | 16.009 | *** |
| e18 | .662     | .028 | 23.746 | *** |
| e19 | .509     | .021 | 24.132 | *** |
| e20 | .283     | .016 | 17.766 | *** |
| e21 | .432     | .022 | 20.071 | *** |
| e22 | .455     | .022 | 20.323 | *** |
| e23 | .382     | .019 | 20.239 | *** |
| e24 | .182     | .015 | 12.381 | *** |
| e25 | .788     | .033 | 24.202 | *** |
| e26 | .567     | .026 | 22.118 | *** |
| e27 | .434     | .021 | 20.390 | *** |
| e28 | .715     | .030 | 24.159 | *** |
| e29 | .157     | .019 | 8.420  | *** |
| e30 | .438     | .022 | 19.677 | *** |
| e31 | .443     | .021 | 20.802 | *** |
| e32 | .427     | .021 | 20.088 | *** |
| e33 | .625     | .028 | 22.248 | *** |
| e34 | .358     | .020 | 17.967 | *** |
| e35 | .505     | .021 | 24.408 | *** |
| e36 | .191     | .010 | 18.714 | *** |
| e37 | .092     | .009 | 10.632 | *** |
| e38 | .211     | .011 | 19.315 | *** |
| e39 | .403     | .020 | 20.061 | *** |
| e40 | .410     | .021 | 19.356 | *** |
| e41 | .305     | .017 | 17.595 | *** |
| e42 | .410     | .020 | 20.214 | *** |
| e43 | .437     | .018 | 23.931 | *** |
| e44 | .130     | .011 | 12.053 | *** |
| e45 | .588     | .024 | 24.468 | *** |
| e46 | .148     | .011 | 12.965 | *** |

### 3. Final Structure Model

#### 3.1. Regression Weights: (Final Structure Model)

|      |      |    | Estimate | S.E. | C.R.   | P    |
|------|------|----|----------|------|--------|------|
| WP   | <--- | MC | .146     | .027 | 5.405  | ***  |
| WP   | <--- | Lw | .147     | .029 | 5.101  | ***  |
| WP   | <--- | Tr | .135     | .032 | 4.164  | ***  |
| WP   | <--- | PE | .207     | .031 | 6.740  | ***  |
| WP   | <--- | Me | .124     | .025 | 4.983  | ***  |
| WC   | <--- | Me | .001     | .022 | .035   | .972 |
| WC   | <--- | PE | .123     | .027 | 4.581  | ***  |
| WC   | <--- | Tr | .111     | .029 | 3.872  | ***  |
| WC   | <--- | Lw | .229     | .026 | 8.652  | ***  |
| WC   | <--- | MC | .087     | .024 | 3.644  | ***  |
| JS   | <--- | WC | .310     | .037 | 8.419  | ***  |
| Ac   | <--- | WP | -.140    | .022 | -6.283 | ***  |
| Ac   | <--- | WC | -.076    | .025 | -3.012 | .003 |
| JS   | <--- | WP | .433     | .033 | 13.261 | ***  |
| MC_2 | <--- | MC | 1.004    | .021 | 47.365 | ***  |
| MC_3 | <--- | MC | .986     | .023 | 43.740 | ***  |
| MC_4 | <--- | MC | .935     | .025 | 37.499 | ***  |
| MC_5 | <--- | MC | .970     | .023 | 41.882 | ***  |
| MC_6 | <--- | MC | .949     | .023 | 41.482 | ***  |
| MC_7 | <--- | MC | 1.014    | .023 | 43.141 | ***  |
| WP_1 | <--- | WP | 1.000    |      |        |      |
| WP_2 | <--- | WP | 1.011    | .030 | 33.146 | ***  |
| WP_3 | <--- | WP | 1.141    | .033 | 35.003 | ***  |
| WP_4 | <--- | WP | 1.072    | .031 | 34.821 | ***  |
| WP_5 | <--- | WP | 1.141    | .032 | 35.719 | ***  |
| WP_6 | <--- | WP | 1.152    | .032 | 36.356 | ***  |
| Lw_1 | <--- | Lw | 1.000    |      |        |      |
| Lw_2 | <--- | Lw | 1.172    | .031 | 37.757 | ***  |
| Lw_3 | <--- | Lw | 1.194    | .037 | 32.472 | ***  |
| Lw_4 | <--- | Lw | 1.184    | .035 | 33.424 | ***  |
| Lw_5 | <--- | Lw | 1.066    | .035 | 30.048 | ***  |
| Lw_6 | <--- | Lw | .872     | .033 | 26.446 | ***  |
| JS_1 | <--- | JS | 1.000    |      |        |      |
| JS_2 | <--- | JS | 1.011    | .018 | 56.974 | ***  |
| JS_3 | <--- | JS | .901     | .022 | 40.427 | ***  |
| JS_4 | <--- | JS | .985     | .025 | 40.153 | ***  |
| JS_5 | <--- | JS | 1.080    | .022 | 48.971 | ***  |
| Tr_1 | <--- | Tr | 1.000    |      |        |      |
| Tr_2 | <--- | Tr | 1.138    | .044 | 25.933 | ***  |
| Tr_3 | <--- | Tr | 1.131    | .042 | 26.817 | ***  |
| Tr_4 | <--- | Tr | .952     | .041 | 22.957 | ***  |
| Tr_5 | <--- | Tr | 1.293    | .045 | 29.018 | ***  |
| PE_1 | <--- | PE | 1.000    |      |        |      |

|      |      |    | Estimate | S.E. | C.R.   | P   |
|------|------|----|----------|------|--------|-----|
| PE_2 | <--- | PE | .913     | .032 | 28.750 | *** |
| PE_3 | <--- | PE | .908     | .032 | 28.387 | *** |
| PE_4 | <--- | PE | .843     | .035 | 24.353 | *** |
| PE_5 | <--- | PE | .999     | .032 | 30.971 | *** |
| WC_1 | <--- | WC | 1.000    |      |        |     |
| WC_2 | <--- | WC | 1.292    | .038 | 34.083 | *** |
| WC_3 | <--- | WC | 1.350    | .038 | 35.345 | *** |
| WC_4 | <--- | WC | 1.313    | .039 | 33.653 | *** |
| Me_2 | <--- | Me | 1.060    | .028 | 38.270 | *** |
| Me_3 | <--- | Me | 1.030    | .026 | 40.149 | *** |
| Me_4 | <--- | Me | .995     | .027 | 37.269 | *** |
| Ac_1 | <--- | Ac | 1.000    |      |        |     |
| Ac_2 | <--- | Ac | 1.274    | .043 | 29.484 | *** |
| Ac_3 | <--- | Ac | 1.014    | .047 | 21.703 | *** |
| Ac_4 | <--- | Ac | 1.295    | .044 | 29.420 | *** |
| Me_1 | <--- | Me | 1.000    |      |        |     |
| MC_1 | <--- | MC | 1.000    |      |        |     |

### 3.2. Standardized Regression Weights: (Final Structure Model)

|      |      |    | Estimate |
|------|------|----|----------|
| WP   | <--- | MC | .164     |
| WP   | <--- | Lw | .147     |
| WP   | <--- | Tr | .128     |
| WP   | <--- | PE | .206     |
| WP   | <--- | Me | .144     |
| WC   | <--- | Me | .001     |
| WC   | <--- | PE | .144     |
| WC   | <--- | Tr | .123     |
| WC   | <--- | Lw | .268     |
| WC   | <--- | MC | .115     |
| JS   | <--- | WC | .229     |
| Ac   | <--- | WP | -.191    |
| Ac   | <--- | WC | -.089    |
| JS   | <--- | WP | .374     |
| MC_2 | <--- | MC | .863     |
| MC_3 | <--- | MC | .887     |
| MC_4 | <--- | MC | .811     |
| MC_5 | <--- | MC | .866     |
| MC_6 | <--- | MC | .861     |
| MC_7 | <--- | MC | .880     |
| WP_1 | <--- | WP | .775     |
| WP_2 | <--- | WP | .820     |
| WP_3 | <--- | WP | .855     |
| WP_4 | <--- | WP | .852     |
| WP_5 | <--- | WP | .869     |
| WP_6 | <--- | WP | .881     |

|      |      |    | Estimate |
|------|------|----|----------|
| Lw_1 | <--- | Lw | .730     |
| Lw_2 | <--- | Lw | .865     |
| Lw_3 | <--- | Lw | .882     |
| Lw_4 | <--- | Lw | .910     |
| Lw_5 | <--- | Lw | .741     |
| Lw_6 | <--- | Lw | .724     |
| JS_1 | <--- | JS | .868     |
| JS_2 | <--- | JS | .878     |
| JS_3 | <--- | JS | .779     |
| JS_4 | <--- | JS | .837     |
| JS_5 | <--- | JS | .940     |
| Tr_1 | <--- | Tr | .682     |
| Tr_2 | <--- | Tr | .780     |
| Tr_3 | <--- | Tr | .812     |
| Tr_4 | <--- | Tr | .686     |
| Tr_5 | <--- | Tr | .908     |
| PE_1 | <--- | PE | .792     |
| PE_2 | <--- | PE | .760     |
| PE_3 | <--- | PE | .755     |
| PE_4 | <--- | PE | .664     |
| PE_5 | <--- | PE | .814     |
| WC_1 | <--- | WC | .725     |
| WC_2 | <--- | WC | .912     |
| WC_3 | <--- | WC | .948     |
| WC_4 | <--- | WC | .901     |
| Me_2 | <--- | Me | .850     |
| Me_3 | <--- | Me | .878     |
| Me_4 | <--- | Me | .836     |
| Ac_1 | <--- | Ac | .684     |
| Ac_2 | <--- | Ac | .909     |
| Ac_3 | <--- | Ac | .634     |
| Ac_4 | <--- | Ac | .903     |
| Me_1 | <--- | Me | .840     |
| MC_1 | <--- | MC | .848     |

### 3.3. Covariances: (Final Structure Model)

|    |      |    | Estimate | S.E. | C.R.   | P   |
|----|------|----|----------|------|--------|-----|
| Lw | <--> | Tr | .260     | .024 | 11.055 | *** |
| Lw | <--> | PE | .227     | .024 | 9.654  | *** |
| Tr | <--> | PE | .251     | .024 | 10.667 | *** |
| Tr | <--> | Me | .267     | .026 | 10.245 | *** |
| PE | <--> | Me | .257     | .027 | 9.553  | *** |
| MC | <--> | Tr | .321     | .026 | 12.192 | *** |
| Lw | <--> | Me | .250     | .026 | 9.471  | *** |
| MC | <--> | Lw | .292     | .026 | 11.168 | *** |
| MC | <--> | Me | .377     | .030 | 12.411 | *** |

|     |      |     | Estimate | S.E. | C.R.    | P   |
|-----|------|-----|----------|------|---------|-----|
| MC  | <--> | PE  | .326     | .027 | 12.112  | *** |
| e20 | <--> | e21 | .120     | .013 | 9.004   | *** |
| e22 | <--> | e23 | .142     | .015 | 9.379   | *** |
| e32 | <--> | e33 | .161     | .019 | 8.593   | *** |
| e20 | <--> | e22 | .099     | .011 | 9.177   | *** |
| e14 | <--> | e15 | .144     | .015 | 9.311   | *** |
| e1  | <--> | e2  | .074     | .011 | 6.518   | *** |
| e27 | <--> | e28 | .173     | .019 | 9.173   | *** |
| e21 | <--> | e23 | -.119    | .010 | -11.772 | *** |
| e14 | <--> | e18 | .121     | .018 | 6.579   | *** |

### 3.4. Correlations: (Final Structure Model)

|     |      |     | Estimate |
|-----|------|-----|----------|
| Lw  | <--> | Tr  | .383     |
| Lw  | <--> | PE  | .318     |
| Tr  | <--> | PE  | .371     |
| Tr  | <--> | Me  | .340     |
| PE  | <--> | Me  | .311     |
| MC  | <--> | Tr  | .419     |
| Lw  | <--> | Me  | .301     |
| MC  | <--> | Lw  | .360     |
| MC  | <--> | Me  | .401     |
| MC  | <--> | PE  | .405     |
| e20 | <--> | e21 | .395     |
| e22 | <--> | e23 | .315     |
| e32 | <--> | e33 | .303     |
| e20 | <--> | e22 | .247     |
| e14 | <--> | e15 | .315     |
| e1  | <--> | e2  | .220     |
| e27 | <--> | e28 | .329     |
| e21 | <--> | e23 | -.349    |
| e14 | <--> | e18 | .186     |

### 3.5. Variances: (Final Structure Model)

|     | Estimate | S.E. | C.R.   | P   |
|-----|----------|------|--------|-----|
| MC  | .914     | .047 | 19.296 | *** |
| Lw  | .718     | .047 | 15.265 | *** |
| Tr  | .641     | .046 | 13.817 | *** |
| PE  | .713     | .043 | 16.675 | *** |
| Me  | .963     | .051 | 18.715 | *** |
| e49 | .498     | .030 | 16.447 | *** |
| e50 | .402     | .027 | 15.172 | *** |
| e47 | .365     | .026 | 13.908 | *** |
| e48 | .735     | .038 | 19.428 | *** |
| e1  | .356     | .016 | 22.351 | *** |

|     | Estimate | S.E. | C.R.   | P   |
|-----|----------|------|--------|-----|
| e2  | .317     | .014 | 21.916 | *** |
| e3  | .241     | .011 | 21.207 | *** |
| e4  | .414     | .018 | 23.582 | *** |
| e5  | .287     | .013 | 22.143 | *** |
| e6  | .287     | .013 | 22.312 | *** |
| e7  | .273     | .013 | 21.540 | *** |
| e8  | .477     | .020 | 23.672 | *** |
| e9  | .359     | .016 | 22.775 | *** |
| e10 | .343     | .016 | 21.634 | *** |
| e11 | .312     | .014 | 21.770 | *** |
| e12 | .303     | .014 | 21.038 | *** |
| e13 | .275     | .013 | 20.397 | *** |
| e14 | .628     | .027 | 23.676 | *** |
| e15 | .333     | .016 | 20.357 | *** |
| e16 | .291     | .015 | 19.284 | *** |
| e17 | .210     | .012 | 16.825 | *** |
| e18 | .669     | .028 | 23.822 | *** |
| e19 | .495     | .021 | 24.069 | *** |
| e20 | .316     | .016 | 20.221 | *** |
| e21 | .292     | .017 | 17.195 | *** |
| e22 | .507     | .022 | 23.378 | *** |
| e23 | .399     | .019 | 20.708 | *** |
| e24 | .146     | .013 | 11.610 | *** |
| e25 | .736     | .031 | 23.700 | *** |
| e26 | .535     | .025 | 21.622 | *** |
| e27 | .423     | .021 | 20.142 | *** |
| e28 | .655     | .028 | 23.186 | *** |
| e29 | .229     | .018 | 12.819 | *** |
| e30 | .423     | .022 | 19.649 | *** |
| e31 | .435     | .021 | 20.901 | *** |
| e32 | .442     | .021 | 20.811 | *** |
| e33 | .641     | .028 | 22.732 | *** |
| e34 | .362     | .020 | 18.552 | *** |
| e35 | .472     | .019 | 24.631 | *** |
| e36 | .176     | .009 | 18.735 | *** |
| e37 | .108     | .008 | 13.448 | *** |
| e38 | .209     | .011 | 19.801 | *** |
| e39 | .402     | .020 | 20.210 | *** |
| e40 | .414     | .021 | 19.660 | *** |
| e41 | .302     | .017 | 17.736 | *** |
| e42 | .412     | .020 | 20.423 | *** |
| e43 | .437     | .018 | 23.939 | *** |
| e44 | .132     | .011 | 12.248 | *** |
| e45 | .589     | .024 | 24.472 | *** |
| e46 | .146     | .011 | 12.852 | *** |
